# Supplementary material for: 3-Hydroxyflavone is a mildly active and safe cobalt chelator while cobalt markedly enhances baicalein toxicity toward erythrocytes
Source: Royal Society of Chemistry journal article supplement (doi:10.1039/d3ra02735j), 2023-01-01
Supplement: d3ra02735j1.pdf [file d3ra02735j1.pdf]

# **3-HYDROXYFLAVONE IS A MILDLY ACTIVE AND SAFE COBALT CHELATOR WHILE COBALT MARKEDLY ENHANCES BAICALEIN TOXICITY TOWARD ERYTHROCYTES**

Monika Moravcová<sup>1</sup>, Zuzana Lomozová<sup>2</sup>, Radim Kučera<sup>3</sup> & Přemysl Mladěnka<sup>1</sup>✉

<sup>1</sup> The Department of Pharmacology and Toxicology, Faculty of Pharmacy in Hradec Králové, Charles University, Akademika Heyrovského 1203, 50005 Hradec Králové, Czech Republic

<sup>2</sup> The Department of Pharmacognosy and Pharmaceutical Botany, Faculty of Pharmacy in Hradec Králové, Charles University, Akademika Heyrovského 1203, 50005 Hradec Králové, Czech Republic

<sup>3</sup> The Department of Pharmaceutical Chemistry and Pharmaceutical Analysis, Faculty of Pharmacy in Hradec Králové, Charles University, Akademika Heyrovského 1203, 50005 Hradec Králové, Czech Republic

## **SUPPLEMENTARY DATA**

**4 PAGES**

|                                                                                                 |                      |                      |                                     |                       |                                     |                                     |                       |                       |
|-------------------------------------------------------------------------------------------------|----------------------|----------------------|-------------------------------------|-----------------------|-------------------------------------|-------------------------------------|-----------------------|-----------------------|
| <b>A</b><br>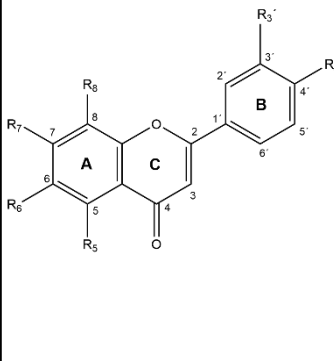   | <b>flavones</b>      | <b>R<sub>5</sub></b> | <b>R<sub>6</sub></b>                | <b>R<sub>7</sub></b>  | <b>R<sub>8</sub></b>                | <b>R<sub>3</sub>'</b>               | <b>R<sub>4</sub>'</b> |                       |
|                                                                                                 | baicalein            | OH                   | OH                                  | OH                    | H                                   | H                                   | H                     |                       |
|                                                                                                 | baicalin             | OH                   | OH                                  | O-Glu                 | H                                   | H                                   | H                     |                       |
|                                                                                                 | diosmin              | OH                   | H                                   | O-Glc-Rha             | H                                   | OH                                  | OCH <sub>3</sub>      |                       |
|                                                                                                 | chrysin              | OH                   | H                                   | OH                    | H                                   | H                                   | H                     |                       |
|                                                                                                 | flavone              | H                    | H                                   | H                     | H                                   | H                                   | H                     |                       |
|                                                                                                 | 5-hydroxyflavone     | OH                   | H                                   | H                     | H                                   | H                                   | H                     |                       |
|                                                                                                 | 7,8-dihydroxyflavone | H                    | H                                   | OH                    | OH                                  | H                                   | H                     |                       |
| <b>B</b><br>  | <b>flavonols</b>     | <b>R<sub>3</sub></b> | <b>R<sub>5</sub></b>                | <b>R<sub>7</sub></b>  | <b>R<sub>2</sub>'</b>               | <b>R<sub>3</sub>'</b>               | <b>R<sub>4</sub>'</b> | <b>R<sub>5</sub>'</b> |
|                                                                                                 | 3-hydroxyflavone     | H                    | H                                   | H                     | H                                   | H                                   | H                     | H                     |
|                                                                                                 | kaempferol           | H                    | OH                                  | OH                    | H                                   | H                                   | OH                    | H                     |
|                                                                                                 | morin                | H                    | OH                                  | OH                    | OH                                  | H                                   | OH                    | H                     |
|                                                                                                 | myricetin            | H                    | OH                                  | OH                    | H                                   | OH                                  | OH                    | OH                    |
|                                                                                                 | isorhamnetin         | H                    | OH                                  | OH                    | H                                   | OCH <sub>3</sub>                    | OH                    | H                     |
|                                                                                                 | quercetin            | H                    | OH                                  | OH                    | H                                   | OH                                  | OH                    | H                     |
|                                                                                                 | rutin                | Glc-Rha              | OH                                  | OH                    | H                                   | OH                                  | OH                    | H                     |
| troxerutin                                                                                      | Glc-Rha              | OH                   | O-C <sub>2</sub> H <sub>4</sub> -OH | H                     | O-C <sub>2</sub> H <sub>4</sub> -OH | O-C <sub>2</sub> H <sub>4</sub> -OH | H                     |                       |
| <b>C</b><br> | <b>flavanols</b>     | <b>R<sub>5</sub></b> | <b>R<sub>7</sub></b>                | <b>R<sub>3</sub>'</b> | <b>R<sub>4</sub>'</b>               | <b>configuration</b>                |                       |                       |
|                                                                                                 | (+)-catechin         | OH                   | OH                                  | OH                    | OH                                  | 2R, 3S                              |                       |                       |
|                                                                                                 | (-)-epicatechin      | OH                   | OH                                  | OH                    | OH                                  | 2R, 3R                              |                       |                       |
| <b>D</b><br> | <b>flavanones</b>    | <b>R<sub>3</sub></b> | <b>R<sub>5</sub></b>                | <b>R<sub>7</sub></b>  | <b>R<sub>3</sub>'</b>               | <b>R<sub>4</sub>'</b>               | <b>configuration</b>  |                       |
|                                                                                                 | hesperetin           | H                    | OH                                  | OH                    | OH                                  | OCH <sub>3</sub>                    | 2S                    |                       |
|                                                                                                 | hesperidin           | H                    | OH                                  | O-Glc-Rha             | OH                                  | OCH <sub>3</sub>                    | 2S                    |                       |
|                                                                                                 | naringenin           | H                    | OH                                  | OH                    | H                                   | OH                                  | 2RS                   |                       |
|                                                                                                 | naringin             | H                    | OH                                  | O-Glc-Rha             | H                                   | OH                                  | 2RS                   |                       |
|                                                                                                 | taxifolin*           | OH                   | OH                                  | OH                    | OH                                  | OH                                  | 2R, 3R                |                       |

**Suppl. Fig. 1 – Chemical structure of tested flavonoids: A: flavones; B: flavonols; C: flavanols; D: flavanones; \*taxifolin can be classified as both, flavanol and flavanone; Glc – glucose, Rha – rhamnose, Glu – glucuronic acid. Structures were created by ChemDraw, version 20.0.**

**A**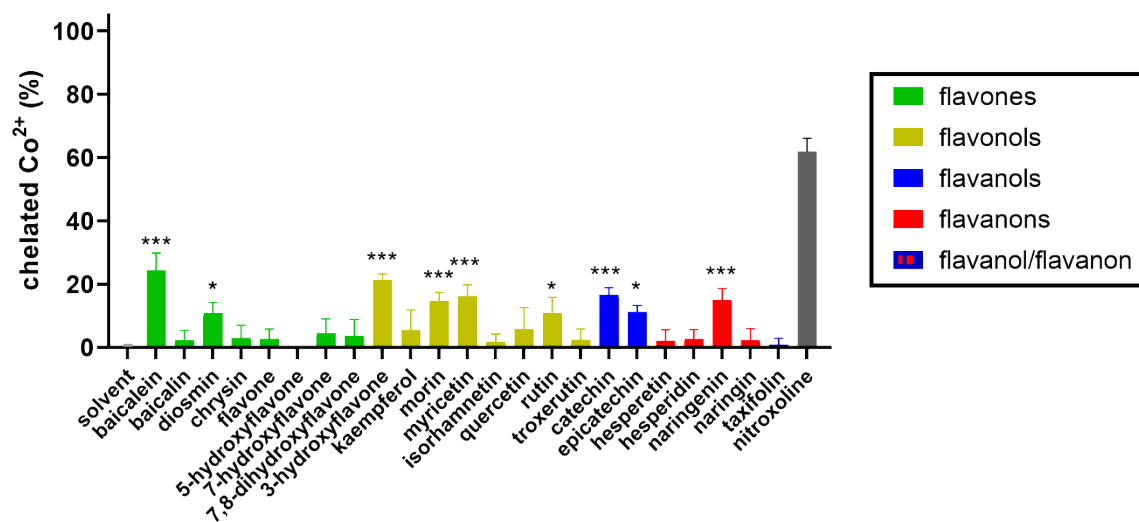**B**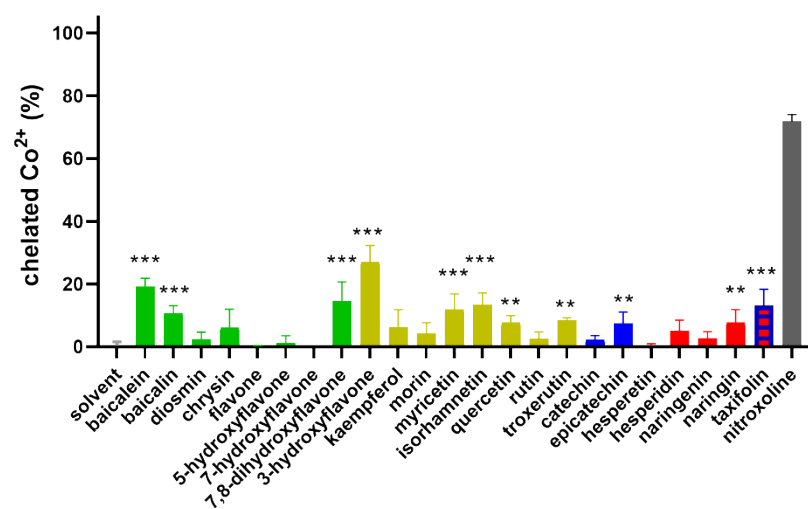

**Suppl. Fig. 2 – Chelation ability of tested flavonoids at pH 7.5 (A) or at pH 6.8 (B):** The ratio of tested flavonoids:cobalt ions was 5:1. Data were analysed from measurement at a wavelength of 540 nm. Nitroxoline was used a positive control, while the solvent DMSO as negative control. All compounds were less active than nitroxoline at both conditions ( $p < 0.001$ , not shown in the graph). \*  $p < 0.05$  vs. solvent, \*\*  $p < 0.01$  vs. solvent, \*\*\*  $p < 0.001$  vs. solvent.

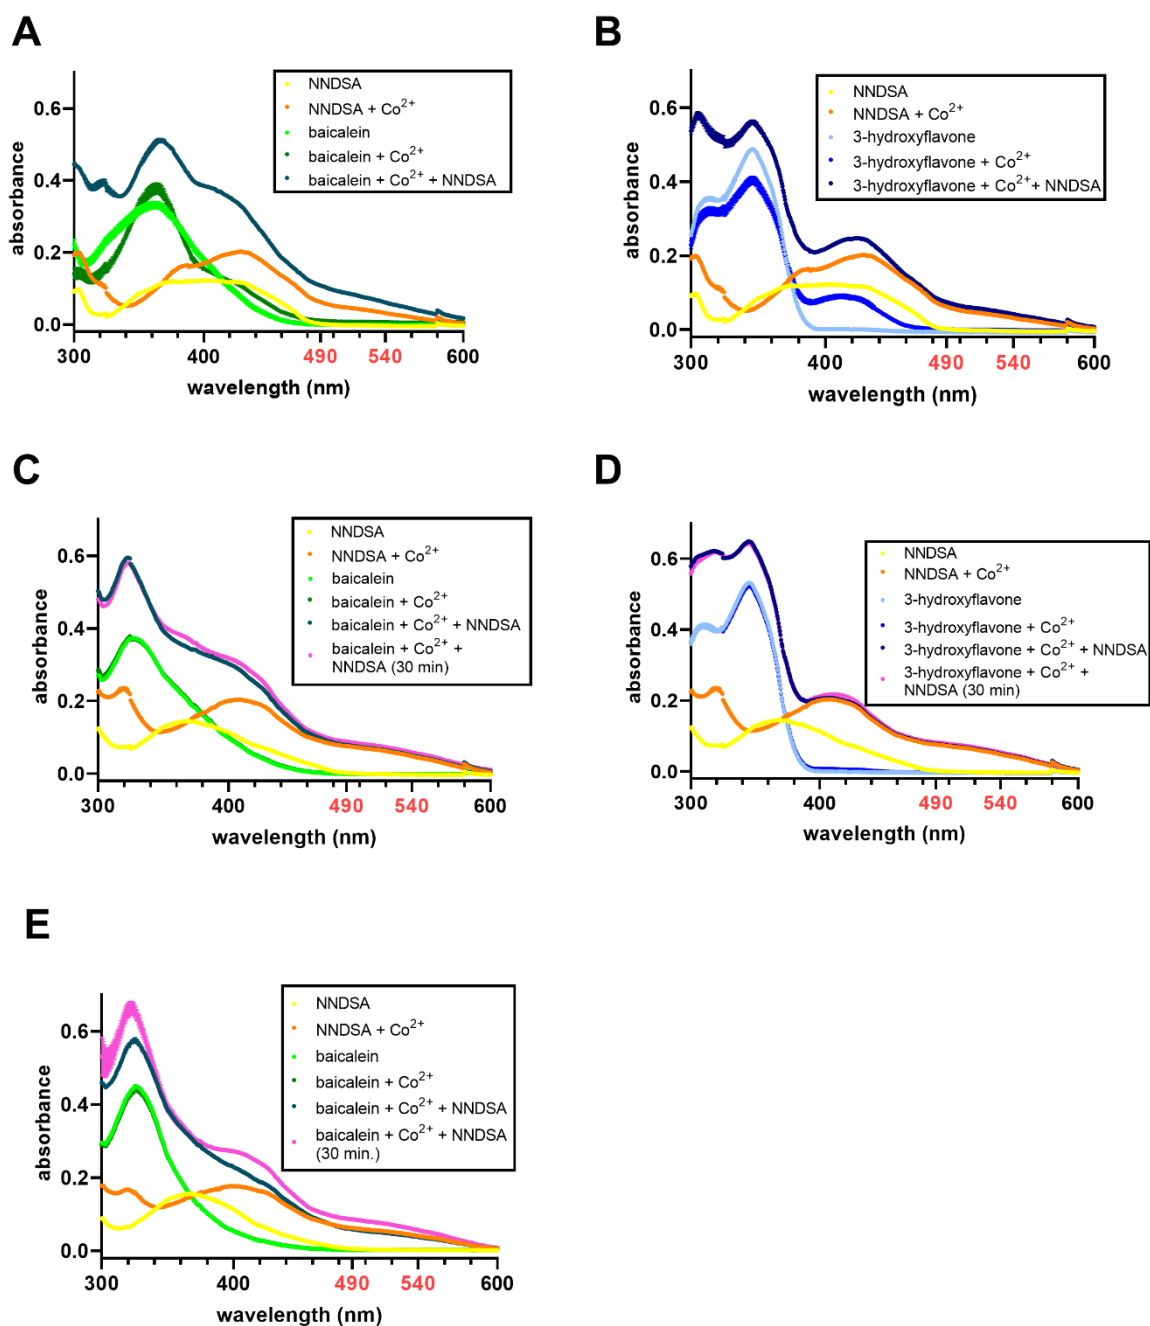

**Suppl. Fig. 3 – Spectra of baicalein (A, C, E) and 3-hydroxyflavone (B, D) with/without cobalt and with the indicator NND SA at pH 7.5 (A, B), 6.8 (C, D) and 5.5 (E):** The final concentration of cobalt was 50  $\mu\text{M}$ , flavonoids 250  $\mu\text{M}$  (ratio flavonoid:cobalt ions was 5:1), and NND SA 300  $\mu\text{M}$ . Based on the spectra of flavonoids and their complexes with cobalt, no interference with the NND SA competitive method was noticed as there was no absorption at 490 or 540 nm. Spectra are averages of three independent experiments (different solutions).
